# Supplementary material
Source: publisher figshare collection journal article supplement (https://karger.figshare.com/ndownloader/files/33157319)
Supplement: Supplementary file 1 [file 33157319]

**Table S2**. Distribution of the individual variants according to their location.

| **Location** | **P1** | **P2** | **P3** | **P4** | **P5** | **P6** | **P7** | **P8** | **P9** | **P10** |
| --- | --- | --- | --- | --- | --- | --- | --- | --- | --- | --- |
| downstream | 929 | 854 | 944 | 2867 | 2465 | 2236 | 2137 | 3243 | 2895 | 2311 |
| exonic | 23616 | 23262 | 22904 | 23890 | 24053 | 23679 | 22847 | 24015 | 23648 | 23843 |
| exonic;splicing | 15 | 11 | 8 | 13 | 10 | 16 | 14 | 13 | 13 | 19 |
| intergenic | 21515 | 23757 | 25611 | 112833 | 82604 | 74493 | 73367 | 138631 | 122702 | 84509 |
| intronic | 77441 | 63256 | 67870 | 153678 | 135736 | 122904 | 122751 | 168771 | 158148 | 132237 |
| ncRNA_exonic | 2816 | 2733 | 2814 | 4021 | 3727 | 3677 | 3575 | 4182 | 4142 | 3861 |
| ncRNA_exonic;splicing | 4 | 5 | 2 | 2 | 1 | 1 | 5 | 3 | 5 | 4 |
| ncRNA_intronic | 4984 | 4605 | 4875 | 14719 | 11858 | 10497 | 10473 | 16226 | 15318 | 11544 |
| ncRNA_splicing | 10 | 12 | 14 | 21 | 15 | 17 | 21 | 17 | 20 | 28 |
| splicing | 85 | 67 | 76 | 76 | 95 | 95 | 78 | 95 | 87 | 92 |
| upstream | 2392 | 2041 | 2267 | 4922 | 4494 | 4239 | 4030 | 5270 | 5189 | 4630 |
| upstream;downstream | 169 | 126 | 155 | 317 | 270 | 262 | 225 | 313 | 310 | 264 |
| UTR3 | 4296 | 3594 | 3780 | 6935 | 6482 | 5955 | 5879 | 7165 | 6980 | 6420 |
| UTR5 | 2628 | 2328 | 2492 | 3322 | 3213 | 2987 | 2939 | 3313 | 3359 | 3296 |
| UTR5; UTR3 | 4 | 4 | 8 | 9 | 8 | 9 | 9 | 5 | 11 | 7 |
